# Supplementary material for: Multi-responsive protein nanocarriers from an anionic dynamic covalent copolymer
Source: Royal Society of Chemistry journal article supplement (doi:10.1039/c4py00117f), 2014-01-01
Supplement: c4py00117f1.pdf [file c4py00117f1.pdf]

## Supporting Information

### Multi-Responsive Protein Nanocarriers from Anionic Dynamic Covalent Copolymer

Xiaobei Wang,<sup>a</sup> Lin Wang,<sup>a</sup> Shixia Yang,<sup>a</sup> Hanying Zhao,<sup>a</sup> Li Liu,<sup>\*,a,b</sup>

*<sup>a</sup>Key Laboratory of Functional Polymer Materials, Ministry of Education, Institute of Polymer Chemistry, Nankai University, Tianjin 300071, P. R. China, and Collaborative Innovation Center of Chemical Science and Engineering (Tianjin), Tianjin 300071, P. R. China. <sup>b</sup>Tianjin Key Laboratory of Biomedical Materials, Tianjin 300192, P. R. China.*

*E-mail: nkliuli@nankai.edu.cn.*

**Modified TNBS assay**

Poly(methylacryloylhydrazide) (PMAH) homopolymer was prepared by the reaction of PMAO homopolymer and excess Hydrazine hydrate. A stock solution of PMAH (1.1 mg/mL) was prepared in a borate buffer (pH 9.3, 0.05 M). A calibration curve was obtained by preparing PMAH of known concentration (3.564, 5.319, 7.092, 8.865, 10.638, 14.184,  $19.5 \times 10^{-5}$  mol/mL). 25  $\mu$ L of this solution were added to a cuvette containing 950  $\mu$ L of borate buffer and 25  $\mu$ L of 0.03 M TNBS solution, After 100 min incubation, the absorption at 500 nm was measured.

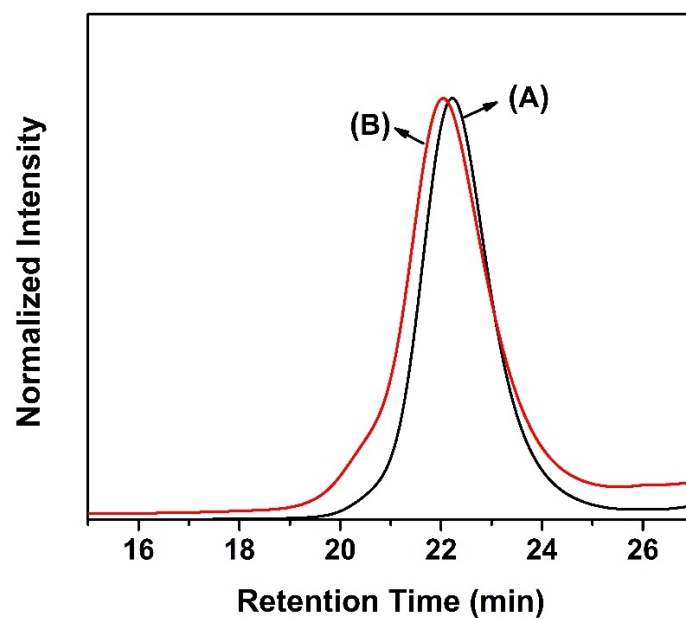

**Figure S1.** GPC traces of (A) P(PEGMA)<sub>17</sub> homopolymer and (B) P(PEGMA)<sub>17</sub>-*b*-PMAO<sub>16</sub> block copolymer.

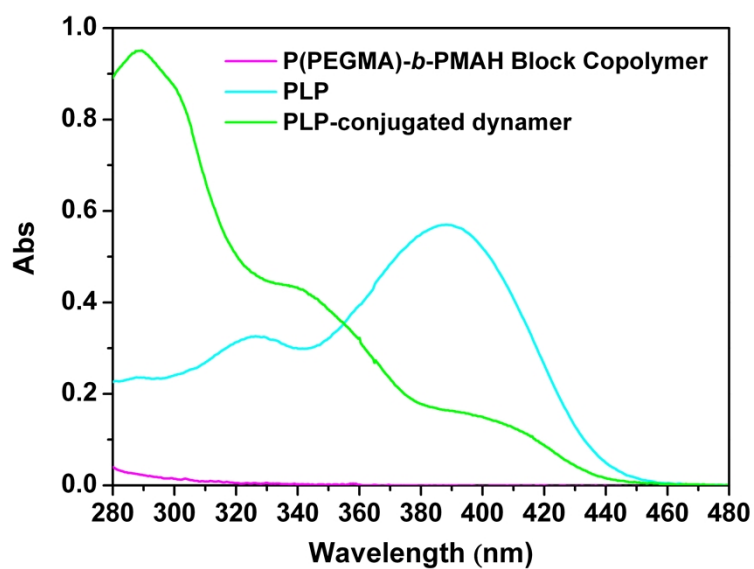

**Figure S2.** Formation of acylhydrazone bond monitored by UV-vis.

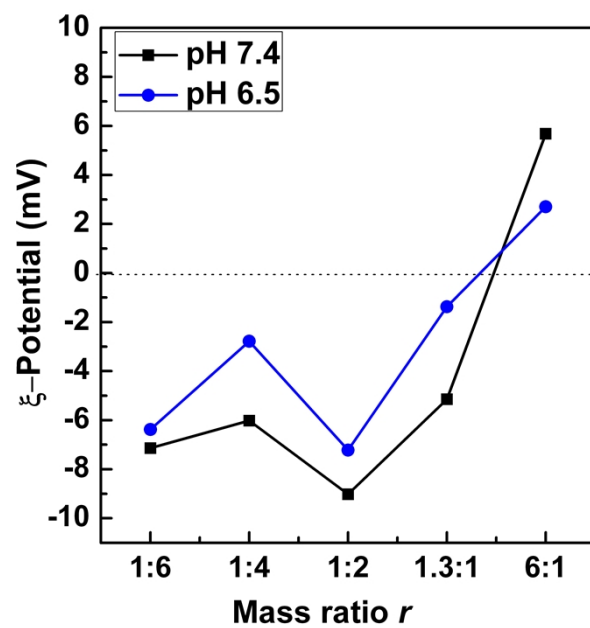

**Figure S3.** Dependence of Zeta potential of the PIC micelles on mass ratio.
